# Supplementary material for: Constructing sheet-assembled hollow CuSe nanocubes to boost the rate capability of rechargeable magnesium batteries
Source: Royal Society of Chemistry journal article supplement (doi:10.1039/d0ta10708e), 2020-12-18
Supplement: d0ta10708e1.pdf [file d0ta10708e1.pdf]

## Electronic Supplementary Information for

# Constructing Sheet-Assembled Hollow CuSe Nanocubes to Boost the Rate Capability for Rechargeable Magnesium Batteries

Changliang Du,<sup>a</sup> Waqar Younas,<sup>a</sup> Zhitao Wang,<sup>a</sup> Xinyu Yang,<sup>a</sup> Erchao Meng,<sup>b</sup> Liqin Wang,<sup>a</sup> Jiaqin Huang,<sup>a</sup> Xilan Ma,<sup>a</sup> Youqi Zhu,<sup>\*a</sup> Chuanbao Cao<sup>\*a</sup>

<sup>a</sup>. Research Center of Materials Science, Beijing Key Laboratory of Construction Tailorable Advanced Functional Materials and Green Applications, Beijing Institute of Technology, Beijing 100081, China, E-mail: yqzhu@bit.edu.cn (Y. Zhu), cbcao@bit.edu.cn (C. Cao).

<sup>b</sup>. Henan Provincial Key Laboratory of Surface and Interface Science, Zhengzhou University of Light Industry, Zhengzhou 450001, China.

## Experimental details

### Preparation of the electrolyte

The  $\text{Mg}(\text{BH}_4)_2/(\text{CF}_3)_2\text{CHOH}/\text{DME}$  electrolyte was prepared in an argon-filled glove box followed by the previous works<sup>S1, S2</sup> after a minor revision. In a typical preparation, 0.10 g  $\text{Mg}(\text{BH}_4)_2$  (95%, Sigma Aldrich) were dispersed in 7 mL DME (99.0%, Alfa Aesar) under continuous stirring to obtain a clear solution. Afterwards, 1.6 mL hexafluoroisopropanol ( $(\text{CF}_3)_2\text{CHOH}$ , 99%, Aladdin) were dropwise added in above solution under stirring. The solution was stirred and dried at room temperature for about 4 days to obtain a solid state. Finally, 6 mL DME is added to the dissolved solids to obtain the 0.3 M  $\text{Mg}(\text{BH}_4)_2/\text{DME}$  electrolyte.

The  $(\text{Mg}(\text{HMDS})_2)\text{-AlCl}_3/\text{DME}$  electrolyte and  $\text{Mg}(\text{AlCl}_2\text{EtBu})_2/\text{THF}$  electrolyte were prepared according to our previous works.<sup>S3, S4</sup>

### Synthesize of the CuSe NPs

The CuSe NPs were prepared with the high-temperature microwave-assisted method followed by the published work.<sup>S5</sup> In a typical preparation, 1 mmol  $\text{Cu}(\text{CH}_3\text{COOH})\cdot\text{H}_2\text{O}$  and 1 mmol  $\text{Na}_2\text{SeO}_3$  were dispersed in 50 mL distilled water by stirring for 30 min. Afterwards, 1 mL 80% hydrazine hydrate and 2 mL ammonium hydroxide were dropwise added in above solution. And then the mixed solution was transformed to a 250 mL flask and put into a microwave reactor at 105°C for 15 min at 400 W. The products were collected and washed centrifugally with ethanol and distilled water for several times. Finally, the CuSe NPs were obtained after dried at 80°C overnight.

## Supplementary figures and tables

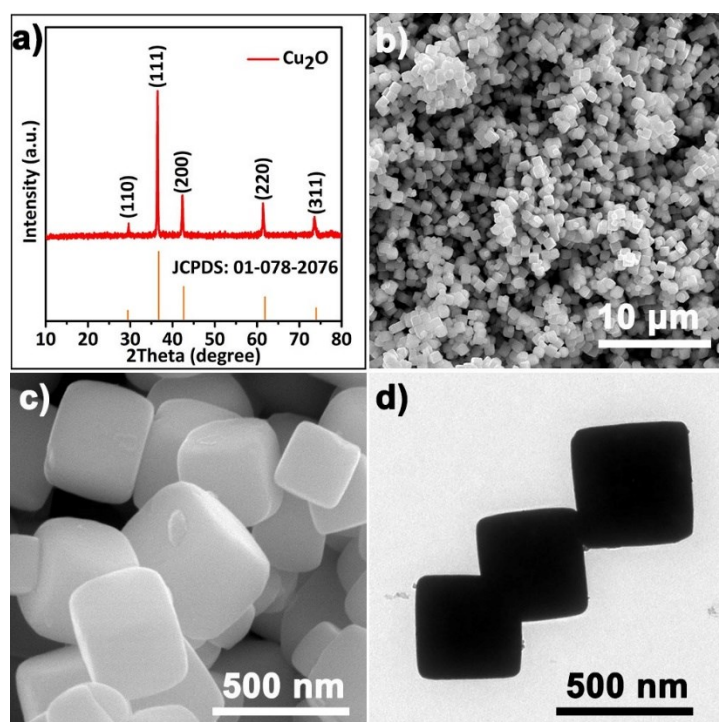

Figure S1. (a) XRD pattern, (b) low-magnification SEM image, (c) high-magnification image and (d) TEM image of the precursor  $\text{Cu}_2\text{O}$  solid cubes.

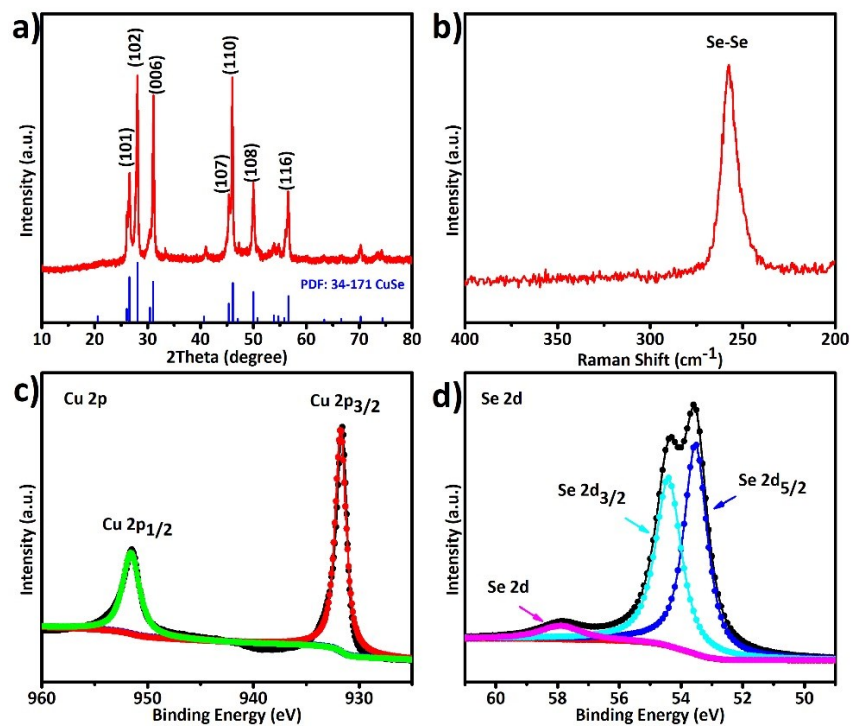

Figure S2. (a) XRD pattern, (b) Raman spectrum, and XPS spectra of (c) Cu 2p and (d) Se 3d of CuSe NPs.

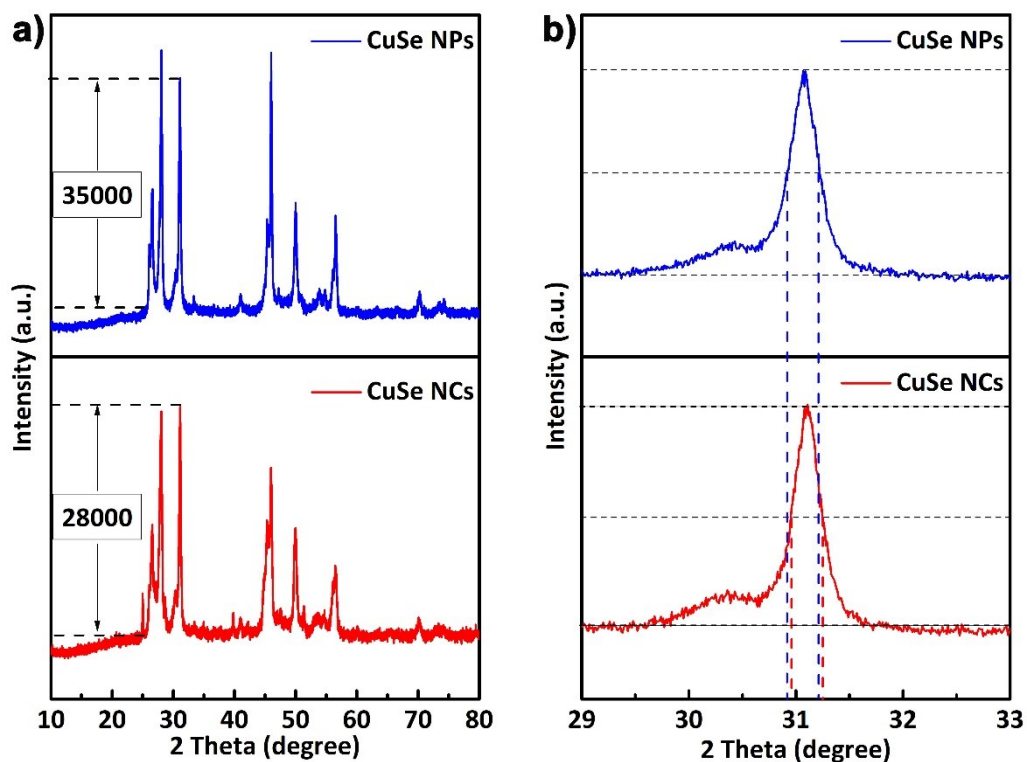

Figure S3. (a, b) XRD patterns of CuSe NCs and CuSe NPs.

The similar peak intensity and half-peak width of the (006) plane diffraction of the CuSe NCs (prepared at room temperature) and CuSe NPs (prepared at 100°C) suggest a similar crystallinity of these two samples. In general, high temperature is more favorable for obtaining samples with good lattice arrangement. Therefore, we believe that the good crystallization of CuSe NCs prepared at room temperature can be attributed to the highly active selenide solution used.

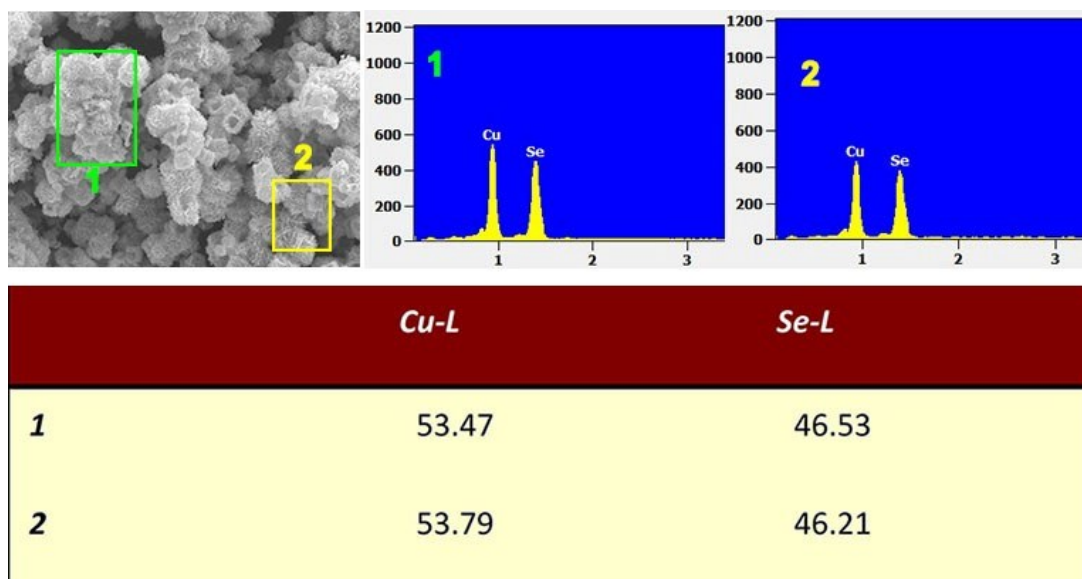

Figure S4. EDX results of CuSe NCs and corresponding ratio of elements to components.

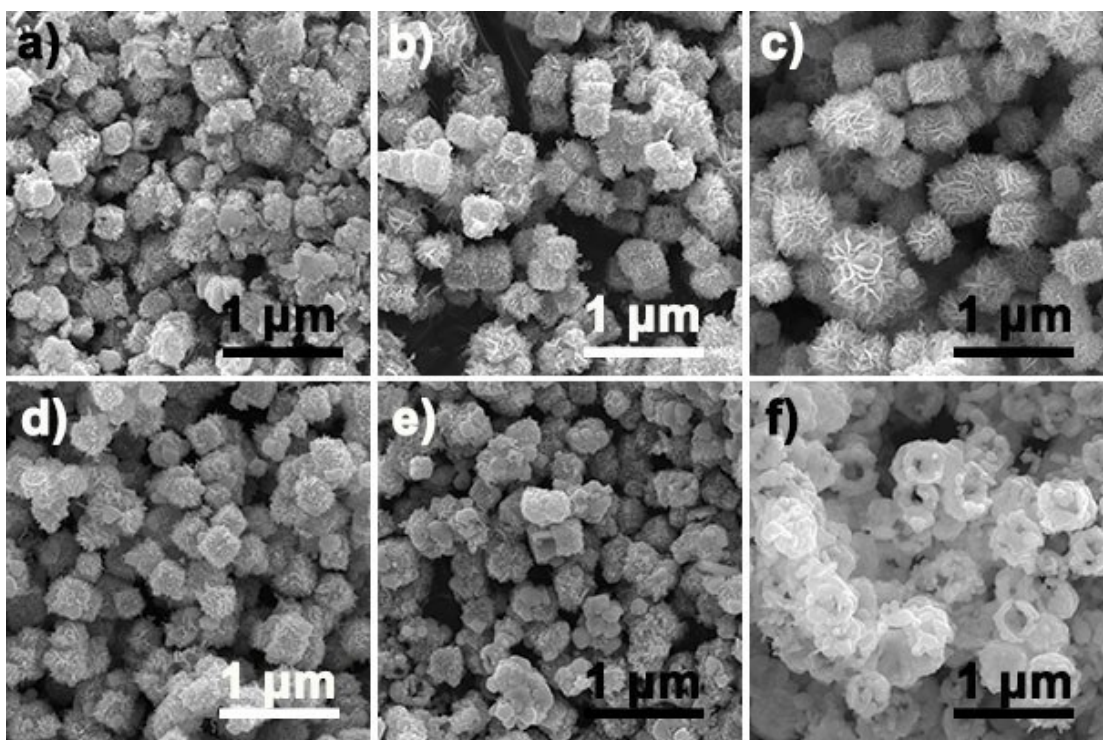

Figure S5. SEM images of the CuSe NCs during different selenide time of (a) 5min, (b) 10 min, (c) 15 min, (d) 20 min, (e) 30 min and (f) 60 min.

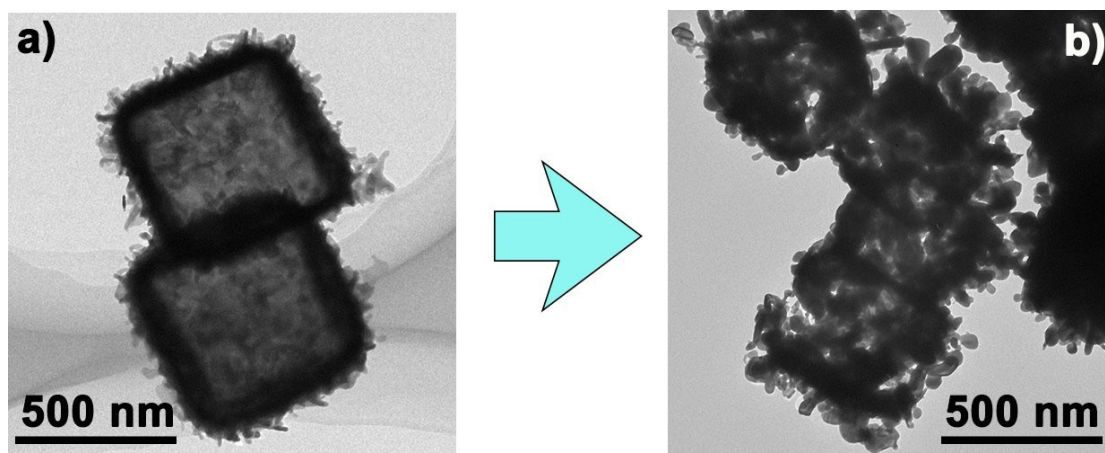

Figure S6. TEM images of CuSe NCs at different selenide time of (a) 15 min and (b) 60 min.

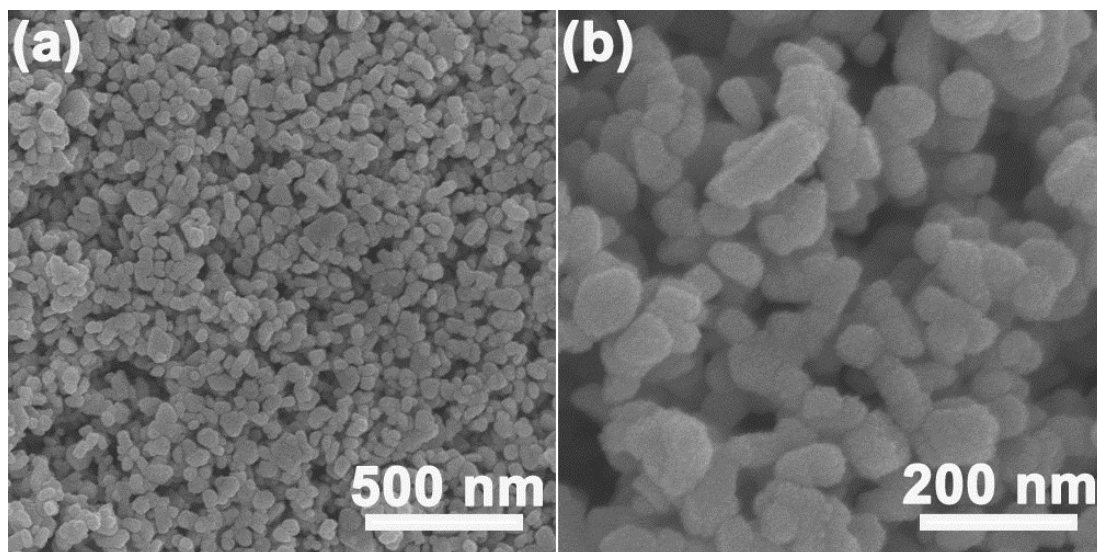

Figure S7. (a) low- magnification and (b) high-magnification SEM images of the CuSe NPs.



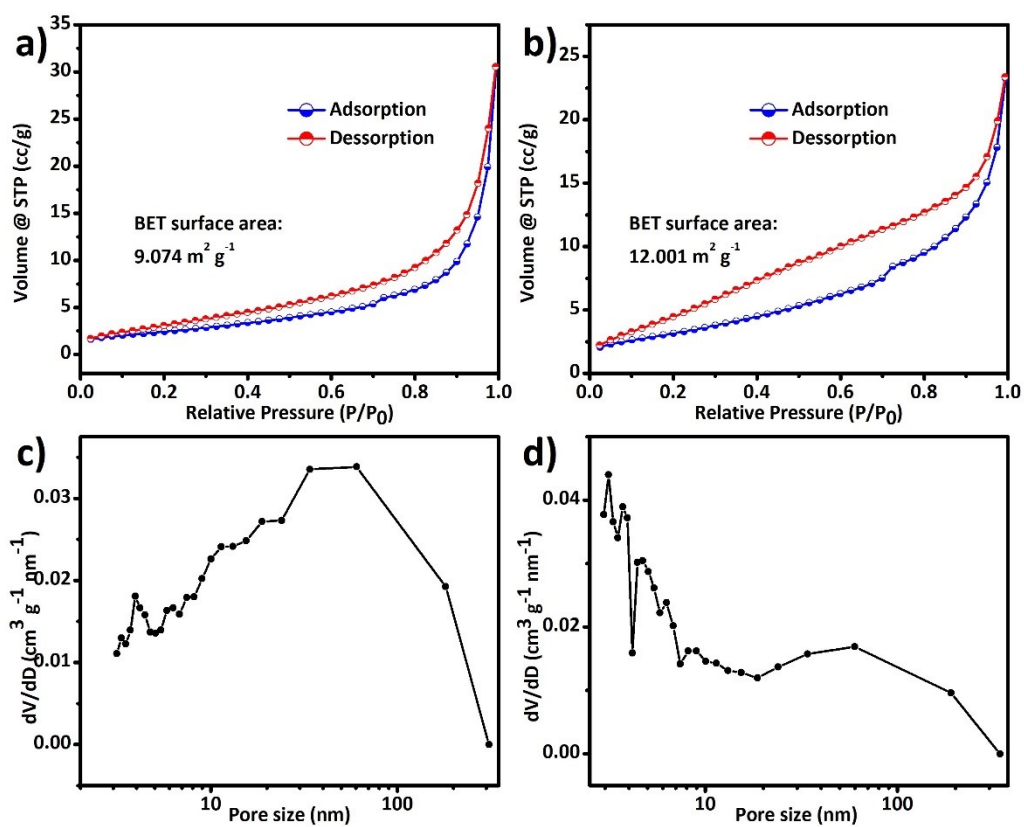

Figure S8. N<sub>2</sub> adsorption–desorption pattern and of (a) CuSe NCs, (b) CuSe NPs, and BJH pore size distribution of (c) CuSe NCs, (d) CuSe NPs.

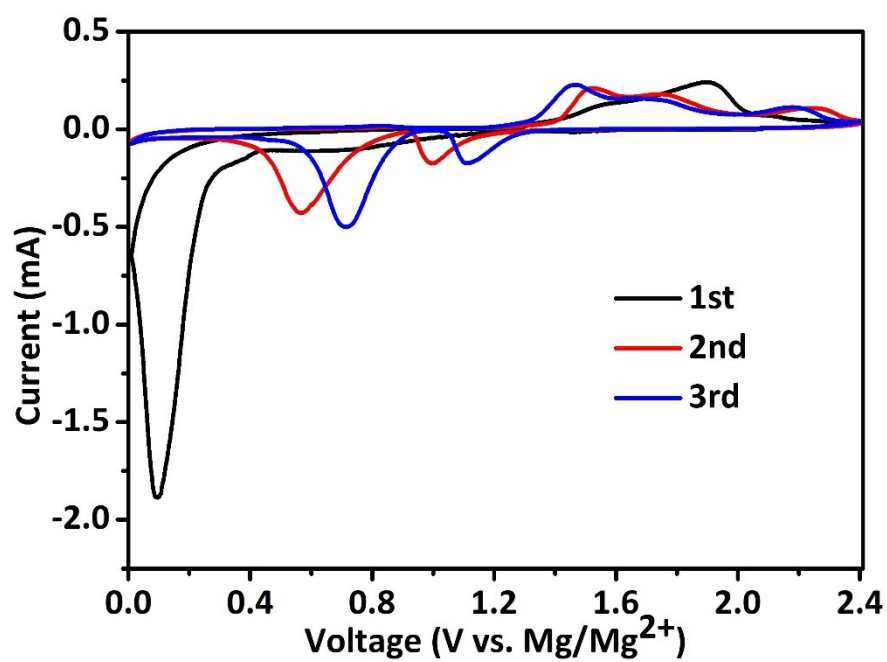

Figure S9. CV curves of the fresh CuSe NCs electrode in  $\text{Mg}(\text{BH}_4)_2/(\text{CF}_3)_2\text{CHOH}/\text{DME}$  electrolyte before activated process.

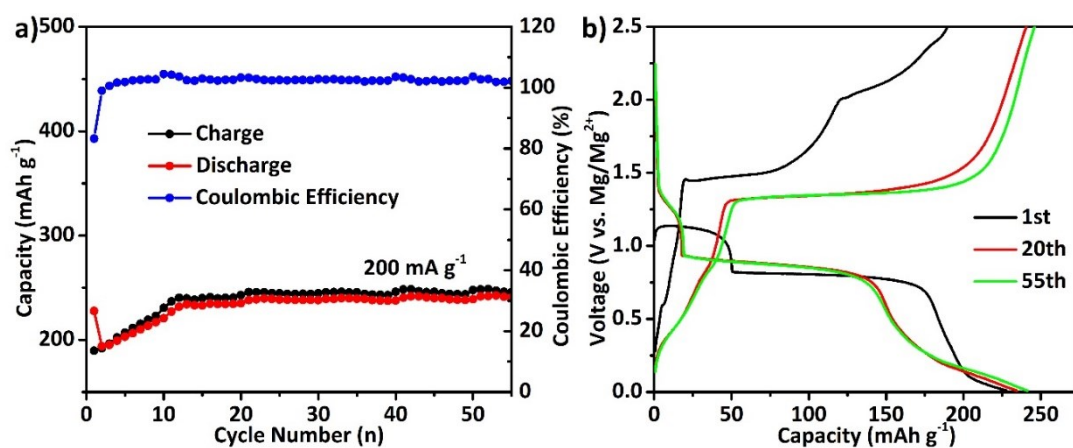

Figure S10. a) Cycling performance, b) charge-discharge voltage profiles of CuSe NCs electrode at 200 mA g<sup>-1</sup> in the voltage window of 0.01-2.5 V.

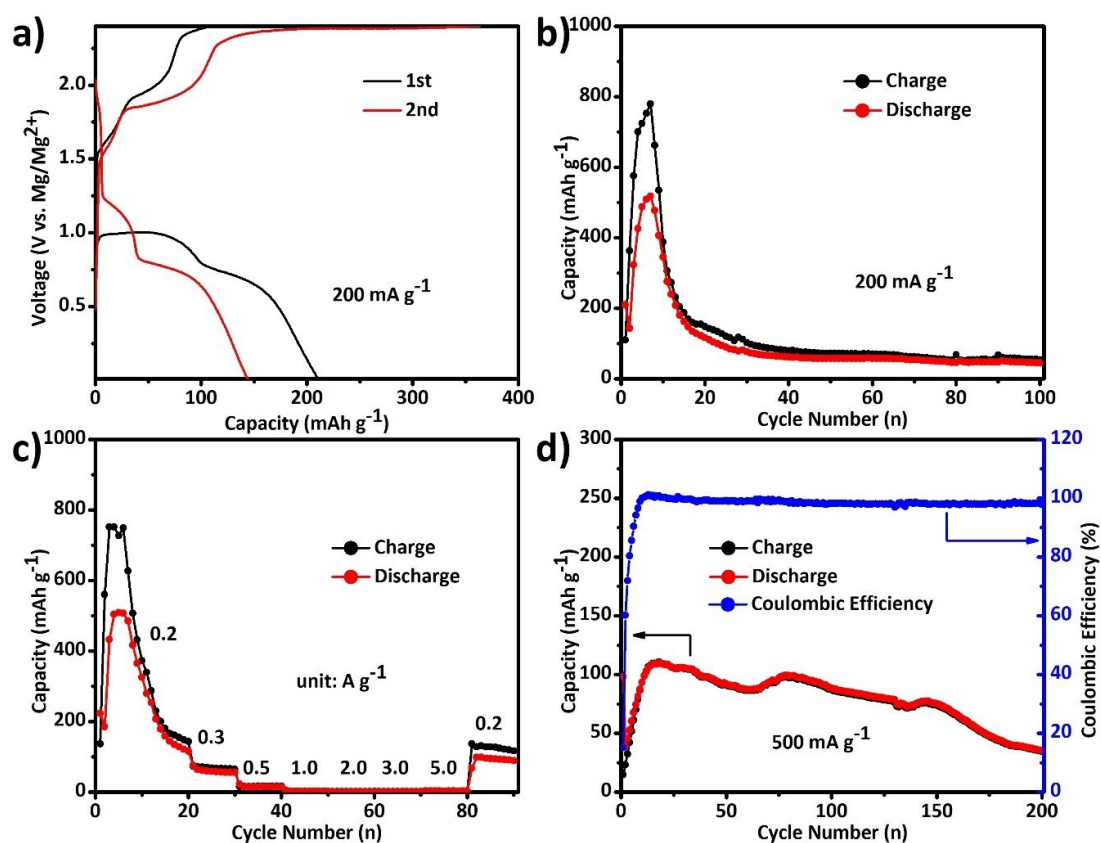

Figure S11. Electrochemical magnesium storage performance of CuSe NCs cathode in  $\text{Mg}(\text{AlCl}_2\text{EtBu})_2/\text{THF}$  electrolyte: (a) charge-discharge voltage profiles at  $200 \text{ mA g}^{-1}$ , (b) cycling performance at  $200 \text{ mA g}^{-1}$ , (c) rate capability and (d) cycling property at  $500 \text{ mA g}^{-1}$ .

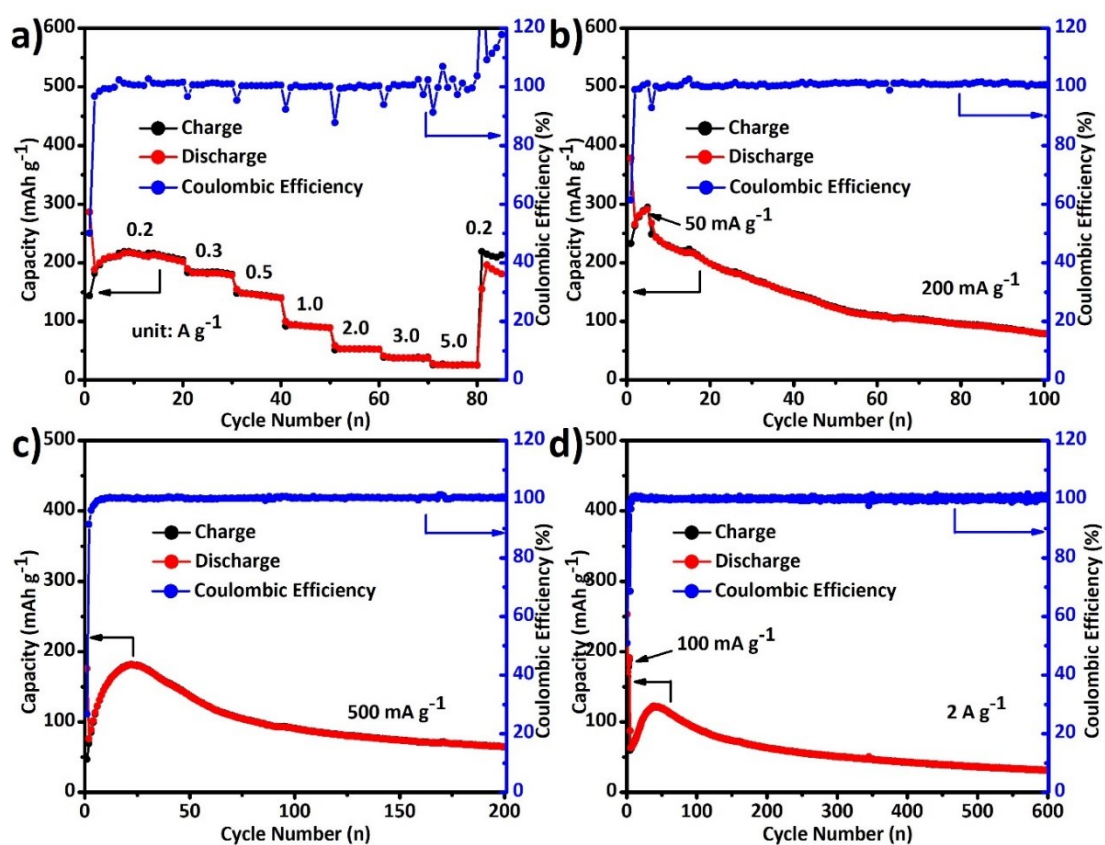

Figure S12. Electrochemical magnesium storage properties of CuSe NCs electrode in (Mg(HMDS)<sub>2</sub>)-AlCl<sub>3</sub>/DME electrolyte: (a) rate property, cycling performances at (b) 200 mA g<sup>-1</sup>, (c) 500 mA g<sup>-1</sup> and (d) 2 A g<sup>-1</sup>.

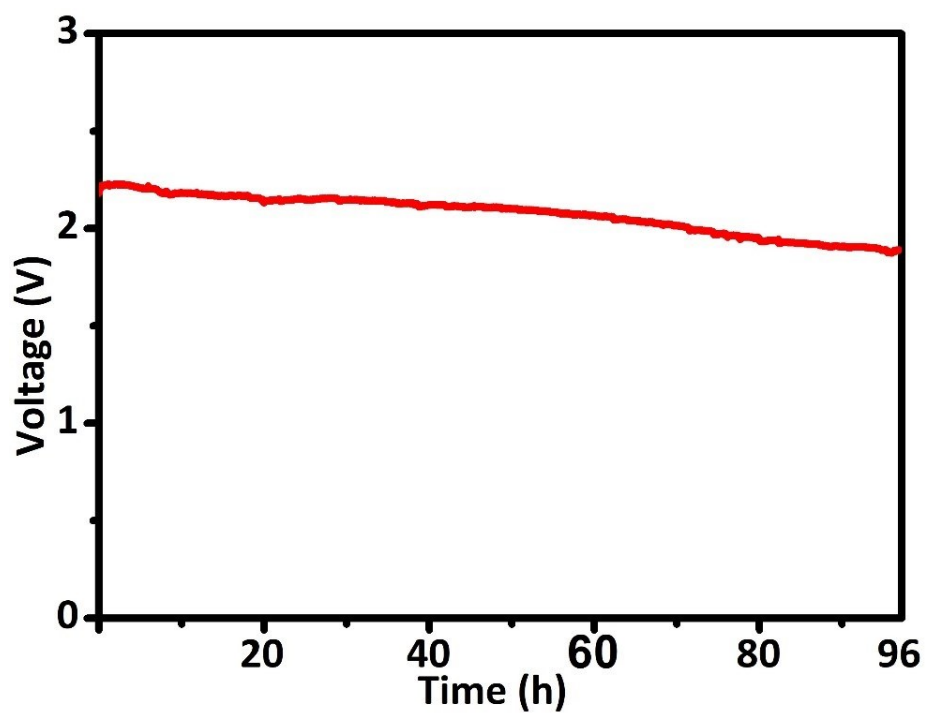

Figure S13. The open-circuit voltage during open circuits of 96 h to investigate the self-discharge behavior of the cells assembled with CuSe NCs cathode and  $\text{Mg}(\text{BH}_4)_2/(\text{CF}_3)_2\text{CHOH}/\text{DME}$  electrolyte.

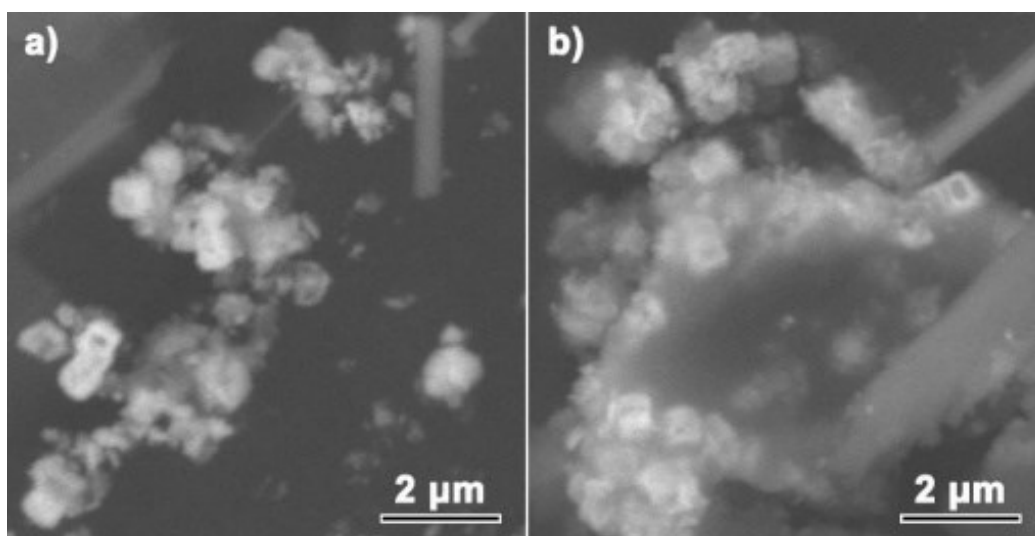

Figure S14. (a, b) SEM images of the CuSe NCs electrode after prolonged cycling.

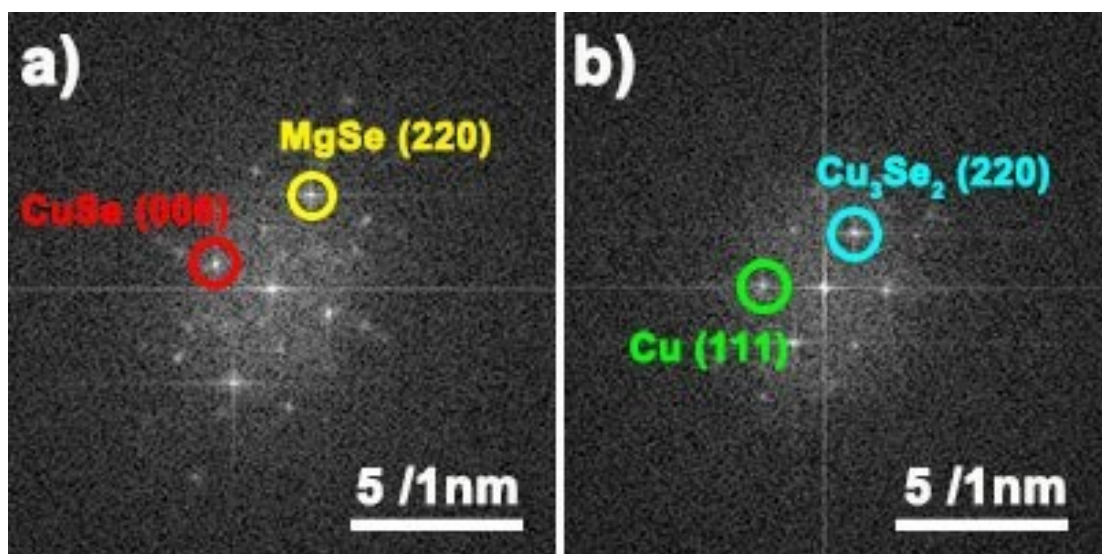

Figure S15. (a, b) Fast Fourier transform electron diffraction pattern of the fully discharged cathode.



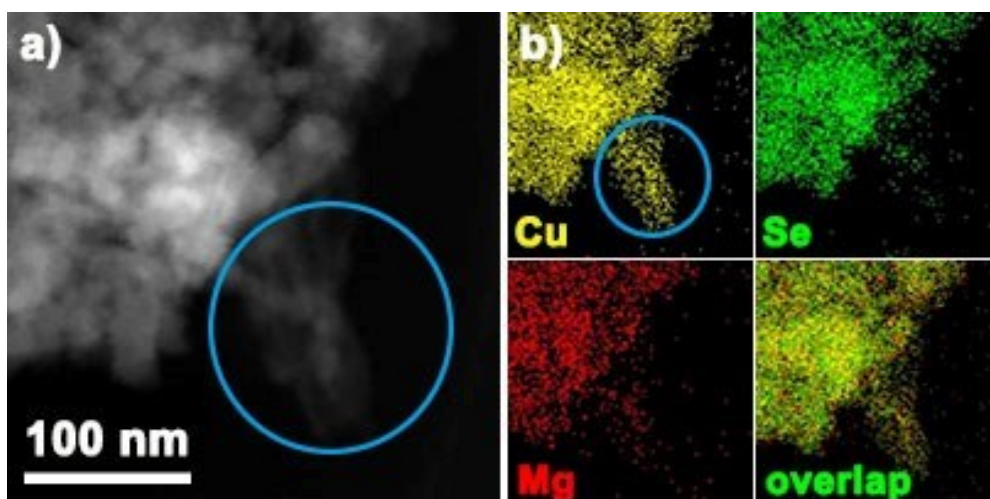

Figure S16. (a) STEM image and (b) corresponding EDS elemental mapping at the fully discharged state

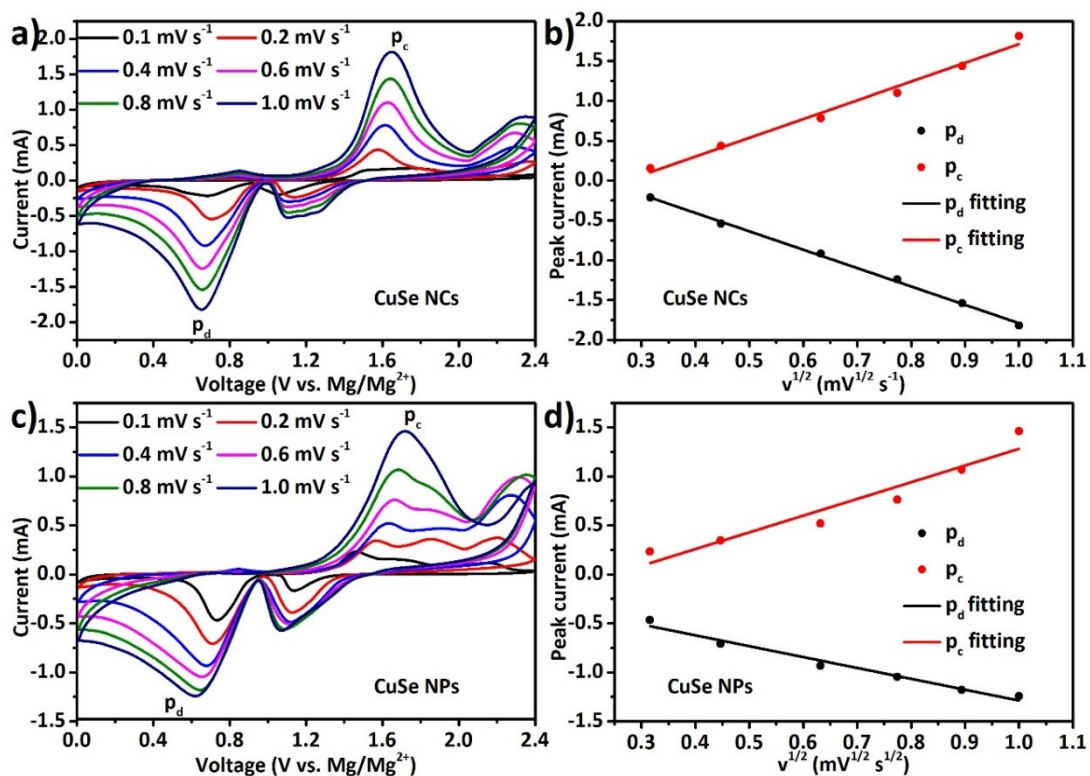

Figure S17. CV tests and plots of CV peak current at various scan rates. CV curves and peak currents versus square root of scan rates of (a, b) the CuSe NCs and (c, d) CuSe NPs electrodes.

Table S1. Summary about the Mg storage properties of some related electrode materials

| Cathode Materials                      | Voltage Window (V vs. Mg/Mg <sup>2+</sup> ) | Current Density (mA g <sup>-1</sup> ) | Capacity (mAh g <sup>-1</sup> ) | Reference |
|----------------------------------------|---------------------------------------------|---------------------------------------|---------------------------------|-----------|
| CuS                                    | 0.01-2.4                                    | 50                                    | 477                             | S1        |
|                                        |                                             | 1000                                  | 90                              |           |
| CuS <sub>1-x</sub> Se <sub>x</sub> NSs | 0-2.0                                       | 20                                    | 268.5                           | S3        |
|                                        |                                             | 500                                   | 119.2                           |           |
| CuS NSs                                | 0-2.0                                       | 20                                    | 400                             | S4        |
|                                        |                                             | 200                                   | 200                             |           |
| CuSe NPs                               | 0.2-2.0                                     | 10                                    | 203                             | S5        |
|                                        |                                             | 100                                   | 50                              |           |
| CuS NCs                                | 0.1-2.4                                     | 100                                   | 200                             | S6        |
|                                        |                                             | 1000                                  | 50                              |           |
| Cu <sub>3</sub> Se <sub>2</sub>        | 0.1-2.0                                     | 100                                   | 277                             | S7        |
|                                        |                                             | 1000                                  | 245                             |           |
| CuSe NCs                               | 0.3-2.2                                     | 100                                   | 250                             | S8        |
|                                        |                                             | 1000                                  | 60                              |           |
| R-CoSe <sub>2</sub>                    | 0-2.5                                       | 50                                    | 210                             | S9        |
|                                        |                                             | 1000                                  | 70                              |           |
| NaV <sub>6</sub> O <sub>15</sub>       | 1.6-2.9                                     | 10                                    | 210.1                           | S10       |
|                                        |                                             | 500                                   | 27.2                            |           |
| V <sub>2</sub> O <sub>5</sub>          | 0.1-2.0                                     | 50                                    | 120                             | S11       |
|                                        |                                             | 200                                   | 62                              |           |
| CoS                                    | 0.1-2.0                                     | 50                                    | 125                             | S12       |
|                                        |                                             | 150                                   | 90                              |           |
| Mo <sub>6</sub> S <sub>8</sub>         | 0.5-1.8                                     | 12                                    | 110                             | S13       |
|                                        |                                             | 600                                   | 78                              |           |
| CuSe nanocubes                         | 0.01-2.4                                    | 200                                   | 254.4                           | This work |
|                                        |                                             | 5000                                  | 77.6                            |           |

## Notes and references

- S1. Y. Shen, Y. Wang, Y. Miao, M. Yang, X. Zhao, X. Shen, *Adv. Mater.* **2019**, 12, 1905524.
- S2. Z. Z. Karger, M. E. G. Bardaji, O. Fuhr, M. Fichtner, *J. Mater. Chem. A* **2017**, 5, 10815-10820
- S3. Z. Wang, Y. Zhu, C. Qiao, S. Yang, J. Jia, S. Rafai, X. Ma, S. Wu, F. Ji, C. Cao, *Small*, **2019**, 15, 1902797.
- S4. Z. Wang, S. Rafai, C. Qiao, J. Jia, Y. Zhu, X. Ma, C. Cao, *ACS Appl. Mater. Interfaces*, **2019**, 11, 7046-7054.
- S5. S. Yang, F. Ji, Z. Wang, Y. Zhu, K. Hu, Y. Ouyang, R. Wang, X. Ma, C. Cao, *Electrochim. Acta*, **2019**, 324, 134864.
- S6. J. Shen, Y. Zhang, D. Chen, X. Li, Z. Chen, S. Cao, T. Li, F. Xu, *J. Mater. Chem. A* **2019**, 7, 21410-21420.
- S7. X. Cheng, Z. Zhang, Q. Kong, Q. Zhang, T. Wang, S. Dong, L. Gu, X. Wang, J. Ma, P. Han, H. Lin, C. Chen, G. Cui, *Angew. Chem. Int. Ed.* **2020**, 59, 11477-11482.
- S8. J. Shen, D. Chen, S. Cao, T. Li, W. Luo, F. Xu, *Dalton Trans.* **2020**, 49, 13253-13261.
- S9. D. Chen, Y. Zhang, X. Li, J. Shen, Z. Chen, S. Cao, T. Li, F. Xu, *Nanoscale*, **2019**, 11, 23173-23181.
- S10. D. Wu, J. Zeng, H. Hua, J. Wu, Y. Yang, J. Zhao, *Nano Res.* **2020**, 13, 335-343.
- S11. Y. Xiao, M. Pan, J. Zou, R. Guo, X. Zeng, W. Ding, *Ionics*, **2019**, 25, 5889-5897.
- S12. D. He, D. Wu, J. Gao, X. Wu, X. Zeng, W. Ding, *J. Power. Sources*, **2015**, 294, 643-649.
- S13. M. Mao, Z. Lin, Y. Tong, J. Yue, C. Zhao, J. Lu, Q. Zhang, L. Gu, L. Suo, Y. Hu, H. Li, X. Huang, L. Chen, *ACS Nano*, **2020**, 14, 1102-1110.
